# Supplementary material for: Examining the Drivers of Racial/Ethnic Disparities in Non-Adherence to Antihypertensive Medications and Mortality Due to Heart Disease and Stroke: A County-Level Analysis
Source: MDPI journal article supplement (doi:10.3390/ijerph182312702), 2021-12-02
Supplement: s1 [file s1]

## Supplemental results

**Table S1.** Distribution of the features of each construct of determinants of health, overall and by geographical regions.

| Variable                                        | Weight | All    | Midwest | Northeast | South  | West   |
|-------------------------------------------------|--------|--------|---------|-----------|--------|--------|
| <b>Health Behaviors</b>                         |        |        |         |           |        |        |
| Adult smoking (%)                               | 0.1    | 18.6   | 18.5    | 16        | 19.4   | 13.8   |
| Adult obesity (%)                               | 0.05   | 31.2   | 30.8    | 26.5      | 32.4   | 24.9   |
| Excessive drinking (%)                          | 0.03   | 16.1   | 18.7    | 18.2      | 15.2   | 18.3   |
| Alcohol driving death (%)                       | 0.03   | 30.8   | 32.4    | 28.3      | 30.8   | 31.8   |
| Sexually transmitted infections (# per 100,000) | 0.03   | 458.4  | 461.5   | 351.9     | 476.2  | 402.5  |
| Teen births (# per 1,000)                       | 0.03   | 43.5   | 35.4    | 22.8      | 48.3   | 34.1   |
| Food environment index                          | 0.02   | 6.8    | 7.1     | 7.9       | 6.6    | 7.4    |
| Physical inactivity (%)                         | 0.02   | 27.4   | 25.1    | 23.6      | 29     | 17.9   |
| Access to exercise (%)                          | 0.01   | 68.4   | 81.6    | 87.6      | 62.2   | 87.1   |
| <b>Clinical Care</b>                            |        |        |         |           |        |        |
| Uninsured (%)                                   | 0.05   | 17.7   | 12.9    | 11.1      | 19.3   | 18.3   |
| Preventable hospital stays (# per 1,000)        | 0.05   | 62.2   | 60.6    | 56.6      | 64.9   | 40.3   |
| Primary care physicians ratio                   | 0.03   | 2327.8 | 1577.9  | 1473.8    | 2629.3 | 1493.8 |
| Diabetic monitoring (%)                         | 0.03   | 85     | 86.2    | 86.1      | 84.8   | 82     |
| Mammography screening (%)                       | 0.03   | 61.9   | 64.2    | 63.6      | 61.5   | 59.6   |
| Dentist ratio                                   | 0.01   | 3040.8 | 1986.1  | 1576.2    | 3516.7 | 1640.7 |
| Mental health provider ratio                    | 0.01   | 2207.5 | 765     | 694.5     | 2781.7 | 453.5  |
| <b>Social Economic Factors</b>                  |        |        |         |           |        |        |
| Unemployment (%)                                | 0.1    | 6.8    | 6.2     | 6.3       | 6.9    | 7.8    |
| Children in poverty (%)                         | 0.08   | 25.4   | 21.7    | 18.3      | 27.3   | 21.5   |
| High school graduation (%)                      | 0.05   | 82.1   | 84.1    | 84.3      | 81.5   | 82.4   |
| Some college education (%)                      | 0.05   | 56.5   | 64.7    | 64.7      | 53.6   | 61.2   |
| Income ratio                                    | 0.03   | 4.8    | 4.5     | 4.8       | 4.8    | 4.7    |
| Single parents households (%)                   | 0.03   | 37.4   | 35.1    | 32.4      | 38.8   | 31.8   |
| Social association rate (# per 10,000)          | 0.03   | 11.5   | 12      | 10.4      | 11.9   | 6.7    |
| Violent crime rate (# per 100,000)              | 0.03   | 373    | 378.4   | 319.5     | 376.8  | 402.4  |
| Injury death (# per 100,000)                    | 0.03   | 69.3   | 61.7    | 53        | 73.4   | 59.6   |
| <b>Physical Environment (PE)</b>                |        |        |         |           |        |        |
| Air pollution (PM2.5)                           | 0.03   | 11.8   | 12.6    | 11.6      | 11.9   | 9.2    |
| Severe housing problems (%)                     | 0.02   | 16.5   | 15      | 18.6      | 16     | 23.7   |
| Driving alone (%)                               | 0.02   | 80.9   | 82.6    | 75        | 81.8   | 74.2   |
| Long commuting driving alone (%)                | 0.01   | 33.3   | 26.9    | 35.4      | 34.2   | 31.2   |

**Table S2.** Distribution of prevalence of AHM non-adherence measures by geographical regions.

|                                                                     | Non-adherence prevalence (%) |                      |                      |                      |                      |
|---------------------------------------------------------------------|------------------------------|----------------------|----------------------|----------------------|----------------------|
|                                                                     | All                          | Midwest              | Northeast            | South                | West                 |
| Overall                                                             | 27.18 (26.93; 27.44)         | 22.48 (22.04; 22.92) | 22.62 (22.03; 23.20) | 28.68 (28.43; 28.92) | 25.82 (24.83; 26.81) |
| White                                                               | 25.41 (25.20; 5.63)          | 21.58 (21.19; 21.98) | 21.46 (21.04; 21.89) | 26.68 (26.48; 26.89) | 24.03 (23.36; 24.69) |
| Black                                                               | 34.50 (34.29; 34.72)         | 32.21 (31.83; 32.59) | 31.90 (31.45; 32.36) | 35.43 (35.18; 35.67) | 31.95 (31.06; 31.85) |
| Racial<br>disparity<br>measure<br>Prevalence<br>rate ratio<br>(PRR) | 1.37 (1.36; 1.37)            | 1.50 (1.48; 1.53)    | 1.49 (1.47; 1.52)    | 1.33 (1.33; 1.34)    | 1.33 (1.30; 1.37)    |

Black

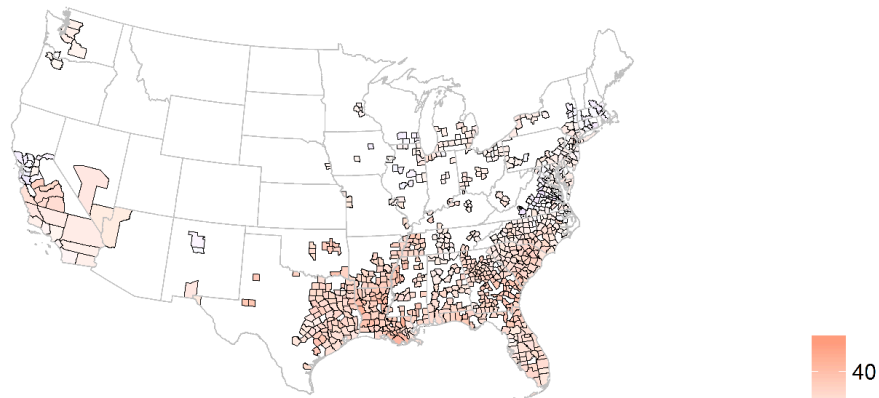

White

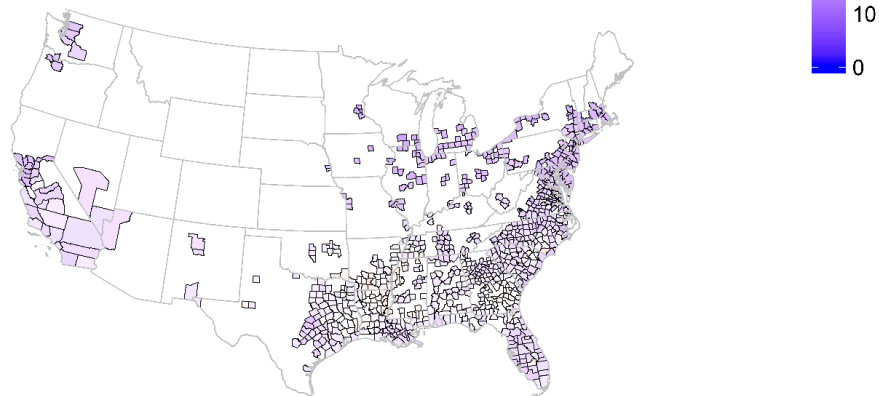

**Figure S1.** Spatial distribution of AHM non-adherence prevalence for BAAs and nHWs among 875 counties in the US.
